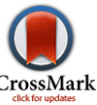

## Correction

# Correction: Practice and Attitude of Cigarette Smoking: A Community-Based Study

## The PLOS ONE Staff

There is an error in the first sentence of the Methods section. The correct sentence should read: The Jazan area, with its eight selected provinces (Jazan, Abu Arish, Fifa, Al-Ardhah, Aldarb, Sabia, Samtah, and Frsan), was chosen as the study area.

There is an error in the penultimate sentence of section 2.2 Variables and Statistical Analysis. The correct sentence should read: A multiple logistic regression and odds ratios were calculated to assess the association between current smokers and the socio-demographic indicators; they were computed with 95% CIs.

There are errors in Figures 2, 4 and 5. In Figure 2 there is a spelling error in the Provinces Vs. Sample Size title; it should read "Selected Participants". In Figure 4, the axes labels are missing. In Figure 5, the values for rural lifestyle are incorrect; the correct values should read 60.04%, 32.54% and 7.42% for very easy, easy and difficult, respectively. Please see the correct Figures 2, 4 and 5 here.

**Citation:** The PLOS ONE Staff (2014) Correction: Practice and Attitude of Cigarette Smoking: A Community-Based Study. PLoS ONE 9(8): e105273. doi:10.1371/journal.pone.0105273

**Published:** August 1, 2014

**Copyright:** © 2014 The PLOS ONE Staff. This is an open-access article distributed under the terms of the Creative Commons Attribution License, which permits unrestricted use, distribution, and reproduction in any medium, provided the original author and source are credited.

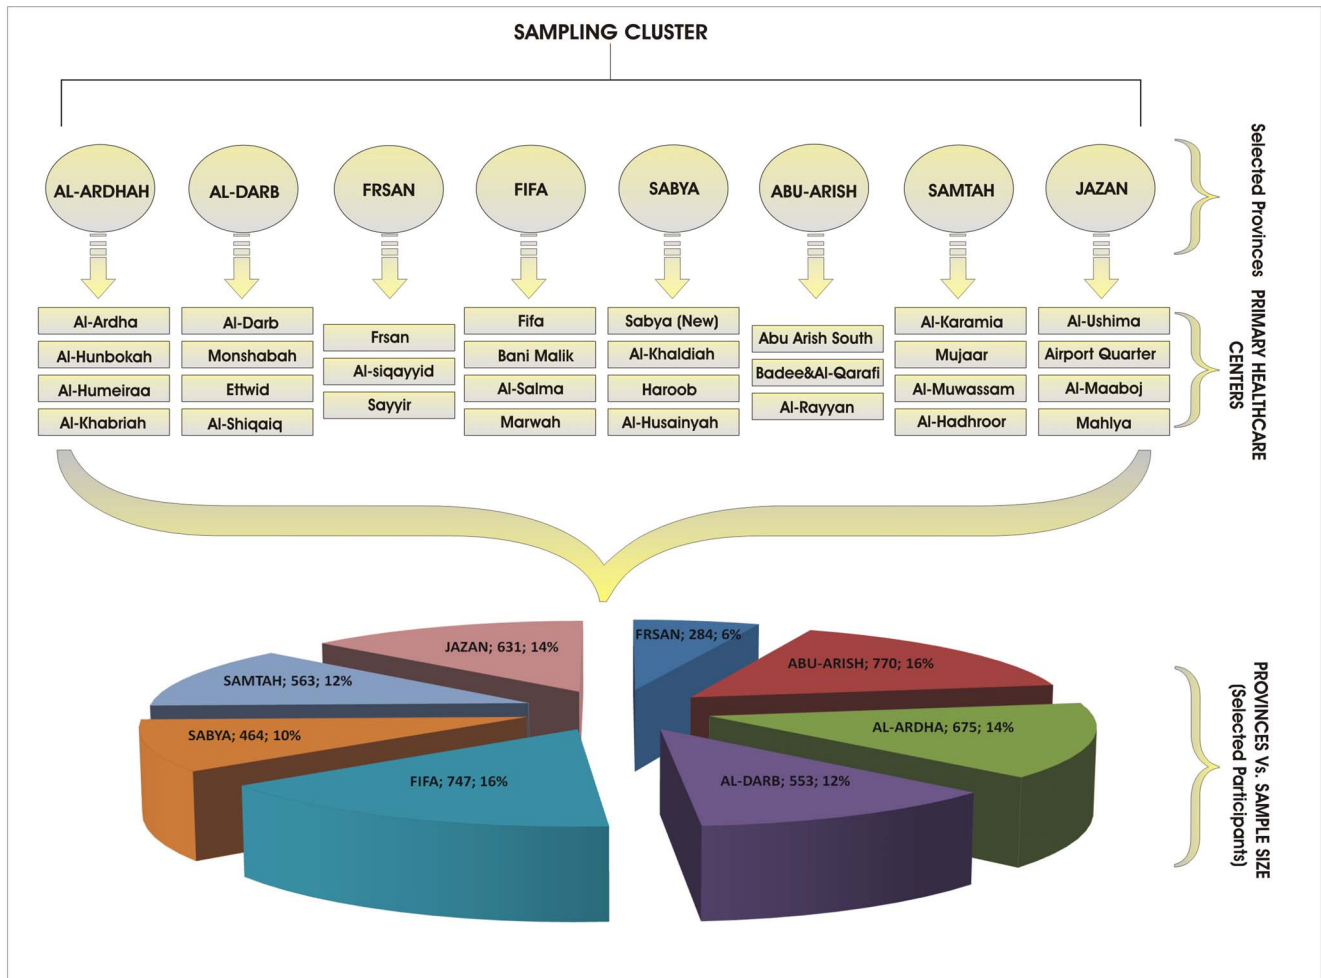

**Figure 2. Design of Data Collection Process.**  
doi:10.1371/journal.pone.0092939.g002

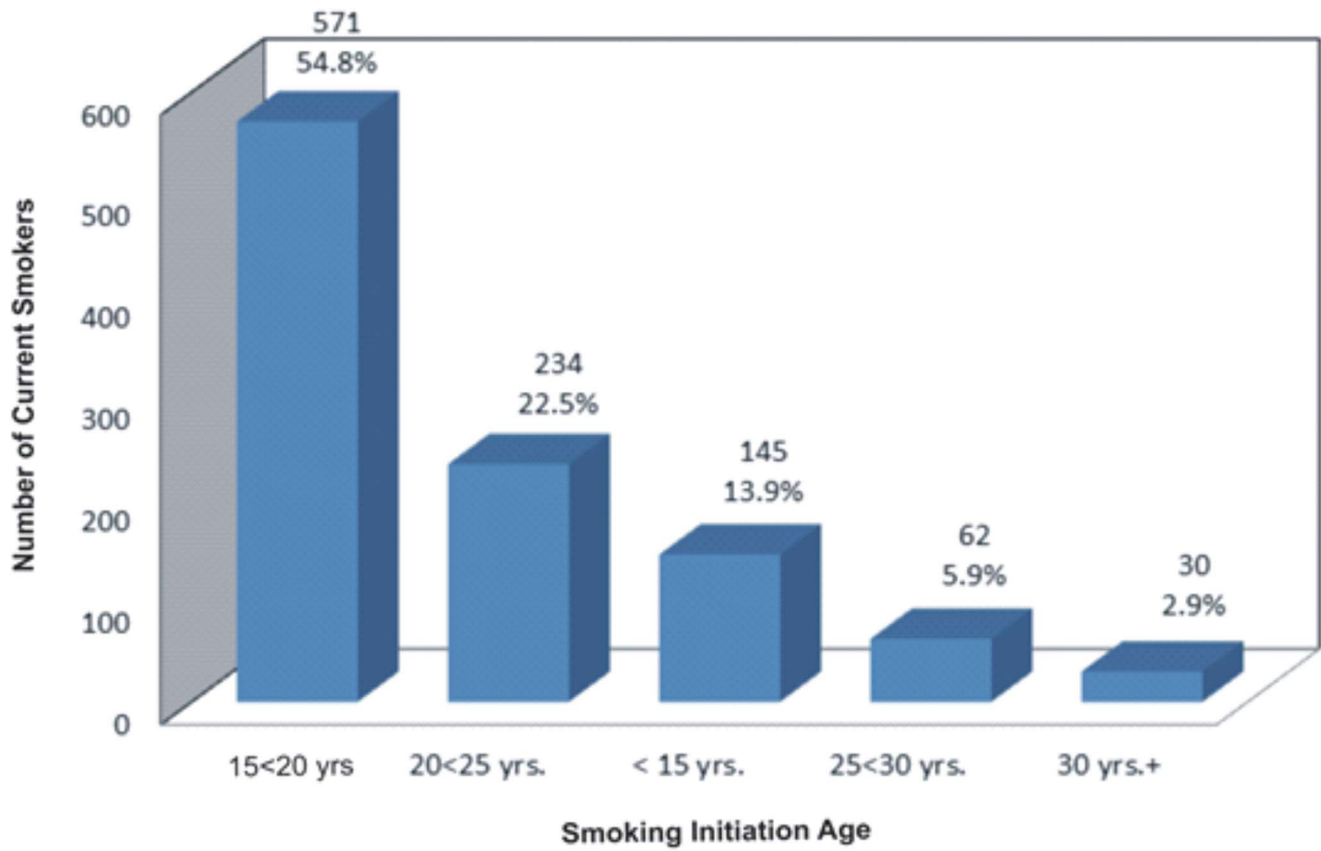

**Figure 4. Classification of Smoking Initiation according to the Age Groups.**  
 doi:10.1371/journal.pone.0092939.g004

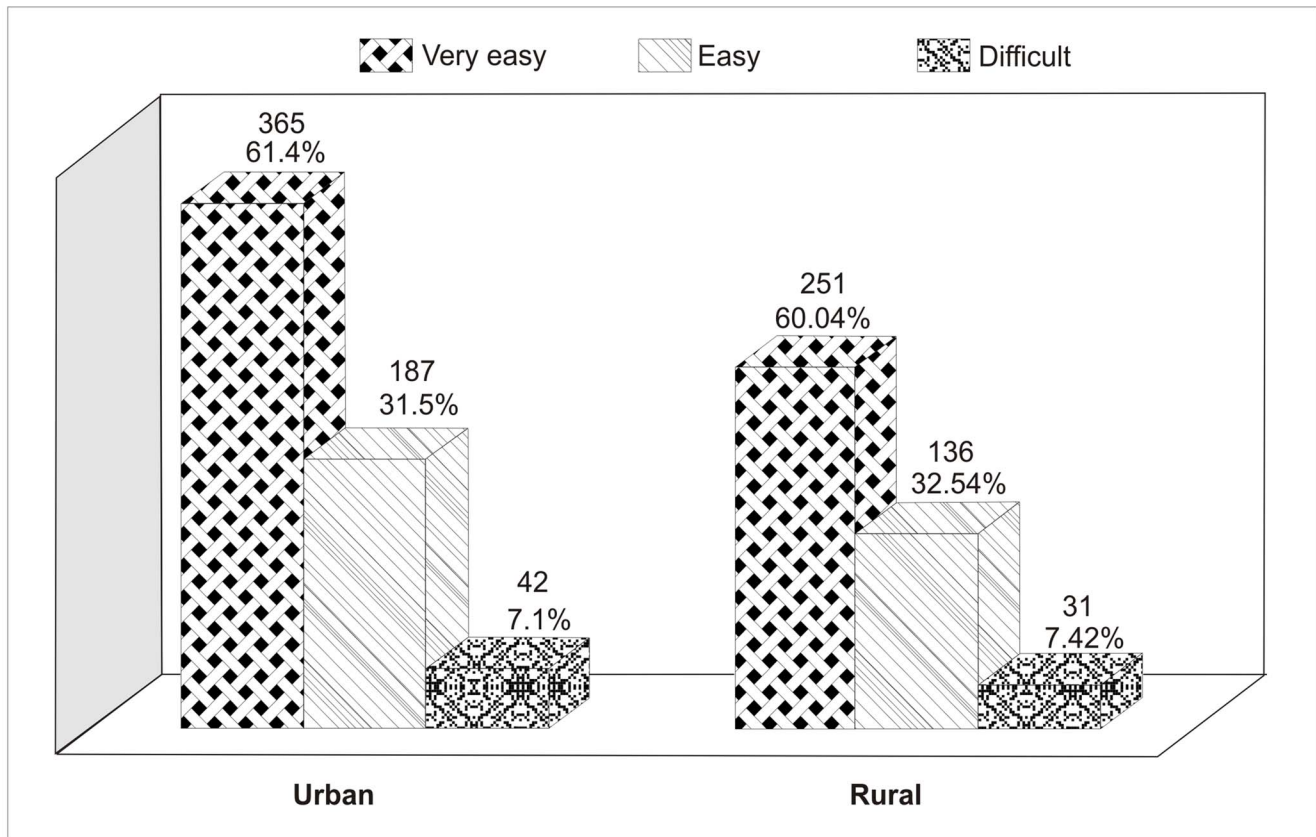

**Figure 5. Categorization of Cigarettes Accessibility vs. Lifestyle.**  
 doi:10.1371/journal.pone.0092939.g005

**Reference**

1. Abdel Rahim B-eE, Mahfouz MS, Yagoub U, Solan YMH, Alsanosy RM (2014) Practice and Attitude of Cigarette Smoking: A Community-Based Study. PLoS ONE 9(4): e92939. doi:10.1371/journal.pone.0092939
